# Supplementary material
Source: PubMed Central journal article supplement (PMC6284781)
Supplement: kepi-13-09-1514231-s001.pdf [file kepi-13-09-1514231-s001.pdf]

# Super-enhancers are transcriptionally more active and cell-type-specific than stretch enhancers

Aziz Khan<sup>1,2,\*</sup>, Anthony Mathelier<sup>1,3</sup> and Xuegong Zhang<sup>2,4</sup>

<sup>1</sup> Centre for Molecular Medicine Norway (NCMM), Nordic EMBL Partnership, University of Oslo, Oslo, Norway

<sup>2</sup> Key Lab of Bioinformatics/Bioinformatics Division, BNRIST (Beijing National Research Center for Information Science and Technology), Department of Automation, Tsinghua University, Beijing 100084, China

<sup>3</sup> Department of Cancer Genetics, Institute for Cancer Research, Oslo University Hospital Radiumhospitalet, 0372 Oslo, Norway

<sup>4</sup> School of Life Sciences, Tsinghua University, Beijing, 100084, China

\* Corresponding author: aziz.khan@ncmm.uio.no

## Supplementary data

---

### Additional figures and data

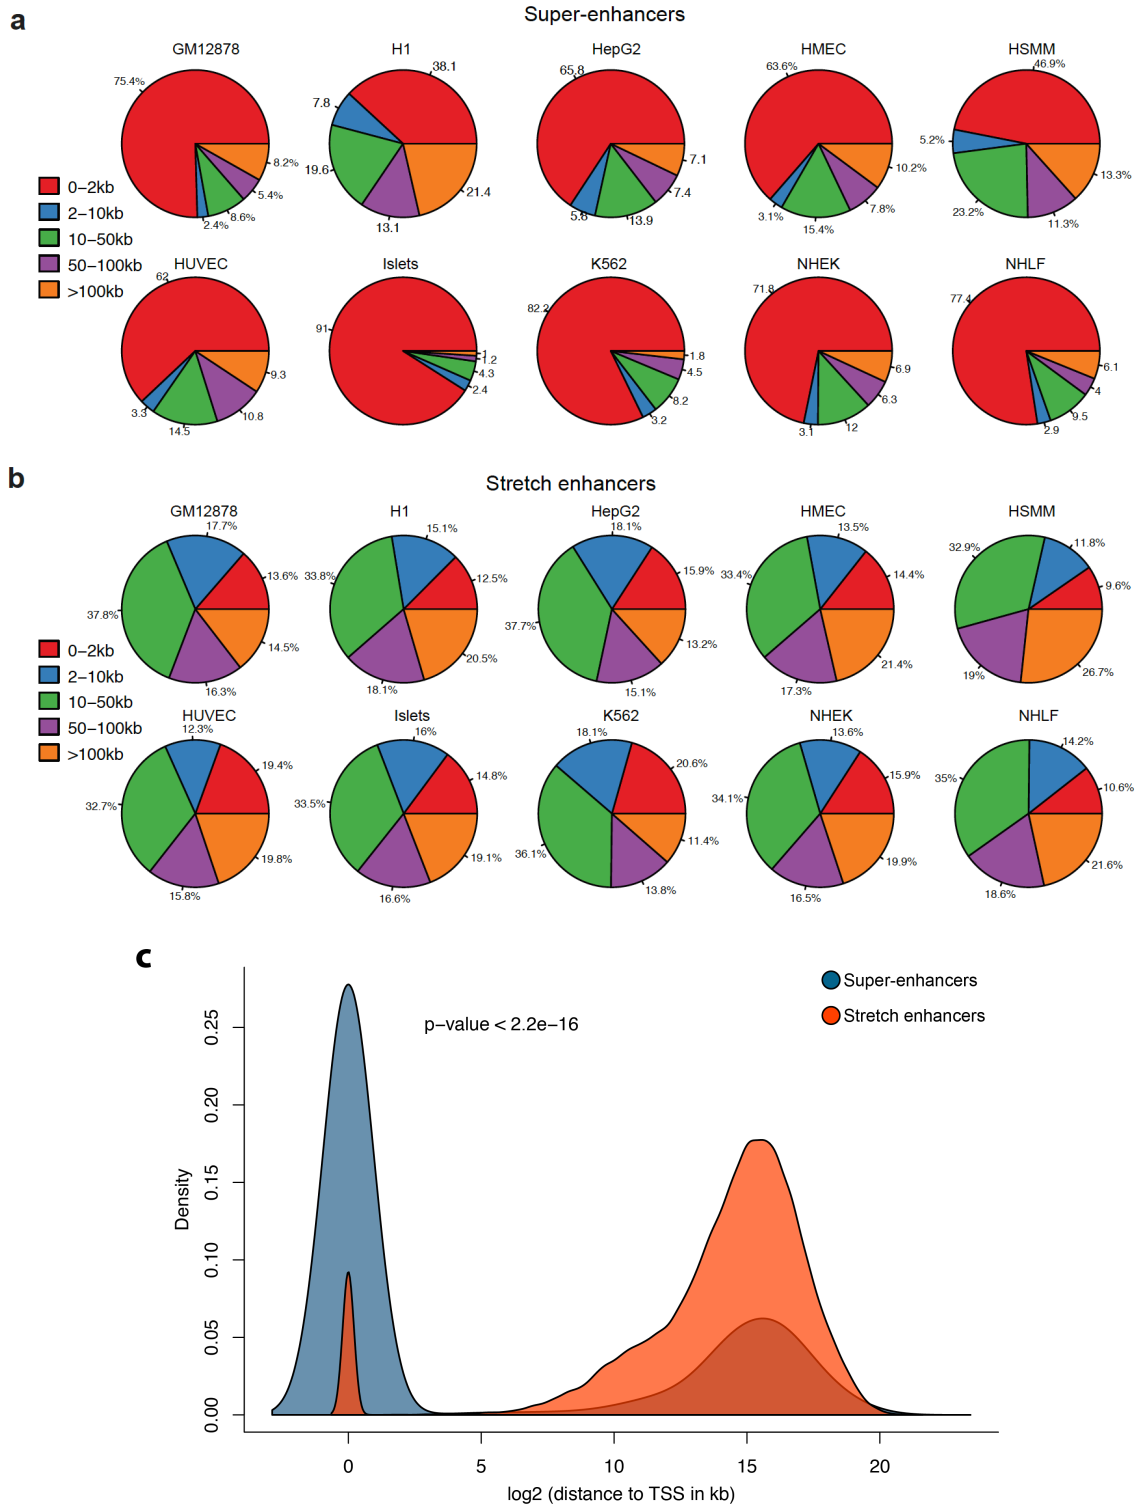

**Figure S1:** Distribution of distance to TSS for super-enhancers (a) and stretch enhancers (b) in ten cell types. (c) The density plot shows the continuous distribution of log<sub>2</sub> of distance to TSS in kb from super-enhancers and stretch enhancers ( $p\text{-value} < 2.2e-16$ , Wilcoxon signed rank test).

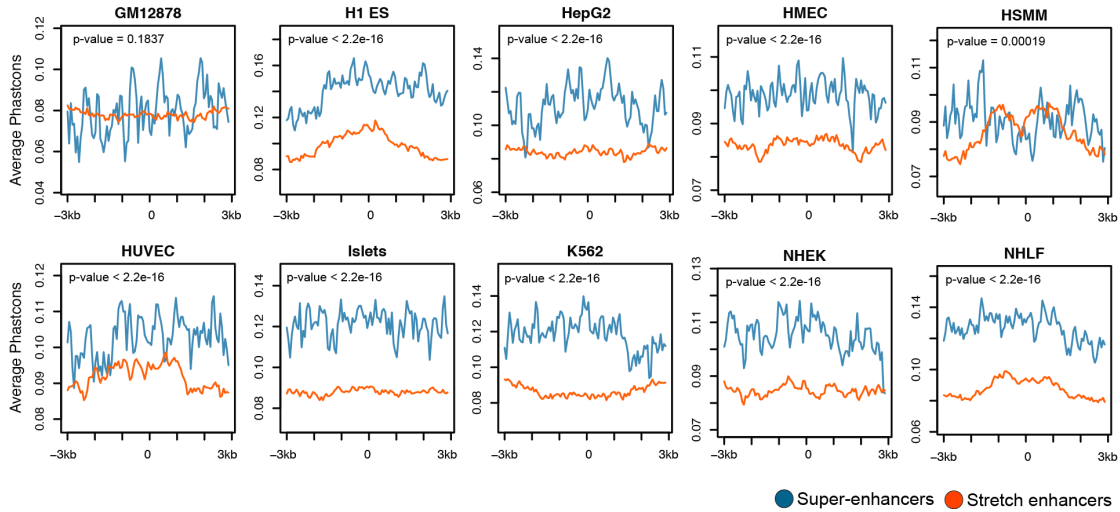

**Figure S2:** Evolutionary conservation score (phastCons) of super-enhancers and stretch enhancers in 10 cell types. P-value is computed using the Wilcoxon rank sum test.

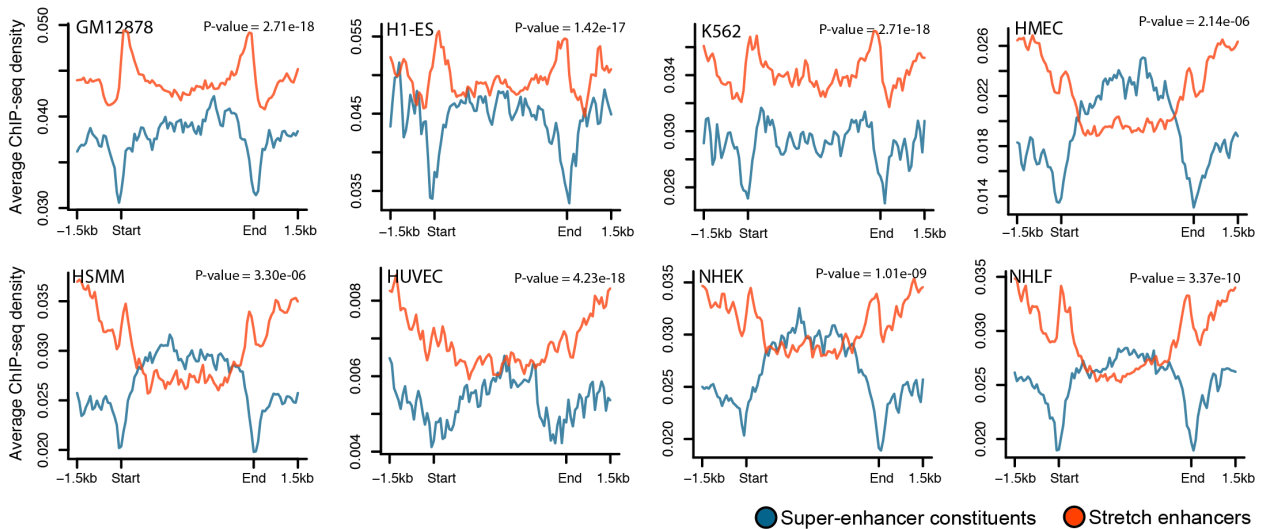

**Figure S3.** Genome-wide profile of poised mark H3K27me3 at the constituents of super-enhancers and stretch enhancers in H1-ES, K562, GM12878, HMEC, HSMM, HUVEC, NHEK, and NHLF cell-lines. The p-values are computed by using Wilcoxon signed rank test.

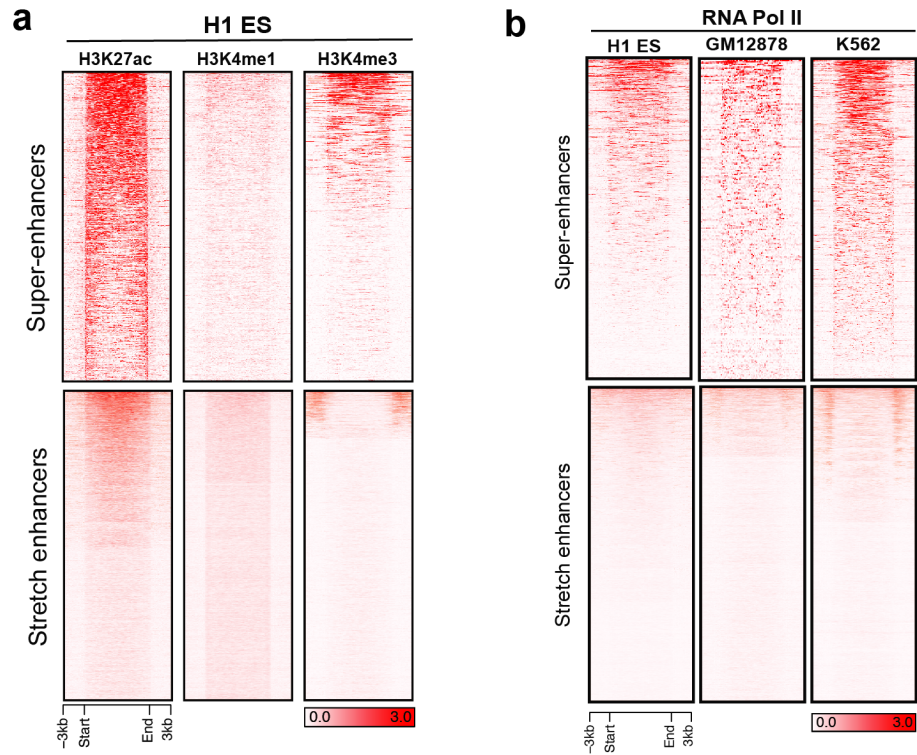

**Figure S4. Chromatin architecture and Pol II at super-enhancers and stretch enhancers** (a) Heatmap of H3K27ac, H3K4me, H3K4me3 and H3K27me3 at super-enhancers and stretch enhancers in H1-ESC (b) Heatmap of RNA Pol II at super-enhancers and stretch enhancers in H1-ESC, GM12878 and K562.

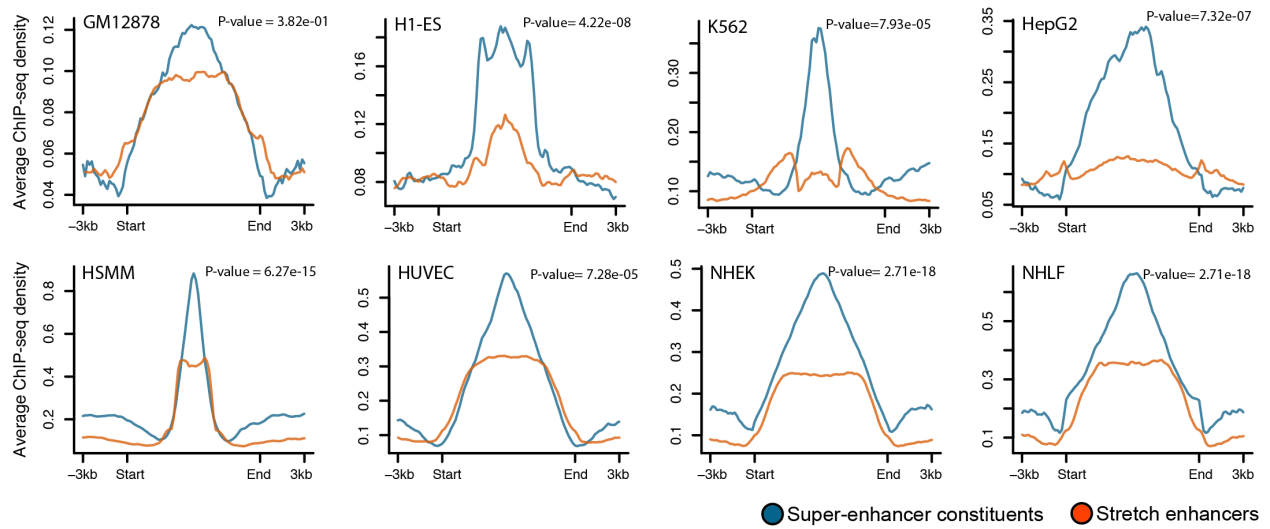

**Figure S5:** Open chromatin (DNase hypersensitivity) profile at super-enhancers and stretch enhancers in H1-ES, K562, GM12878, HepG2, HUVEC, NHEK, NHLF, and HSSM cell-lines. The p-values are computed by using Wilcoxon paired rank test.

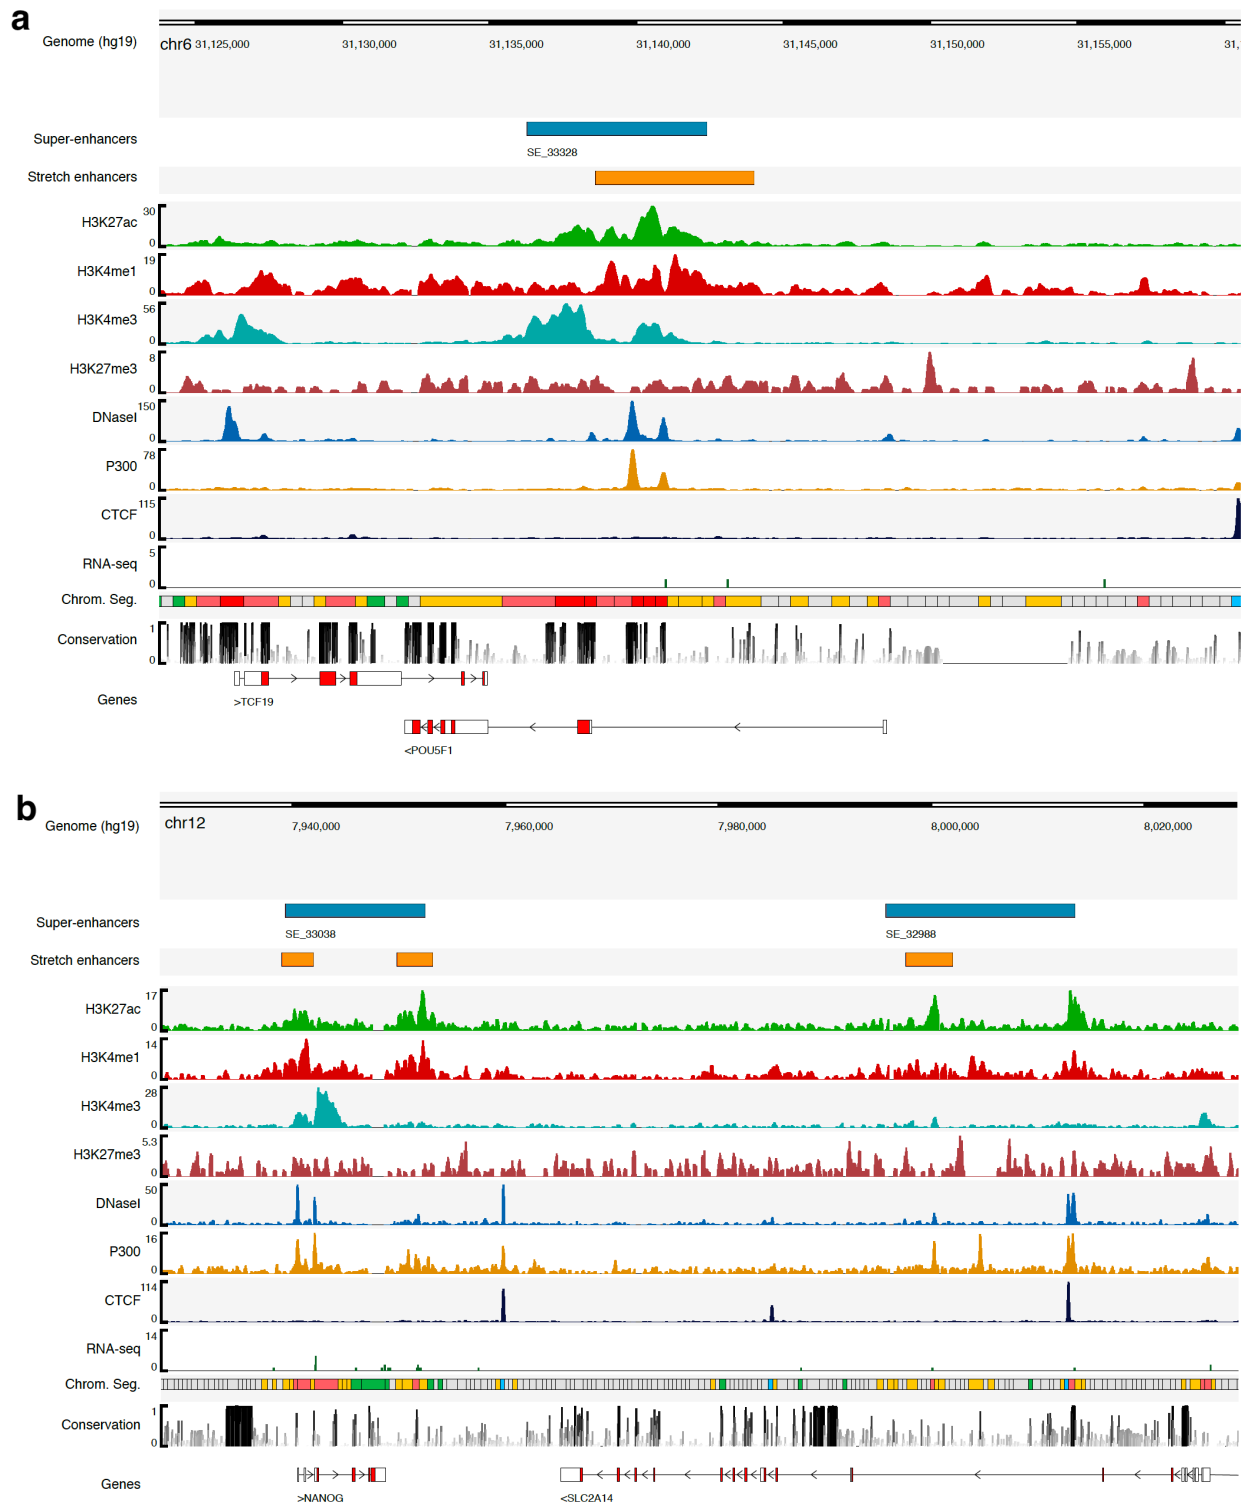

**Figure S6:** Genomic browser screenshot shows the overlap of super and stretch enhancers with ChIP-seq signal of H3K27ac, H3K4me1, H3K4me3, P300, CTCF, open chromatin (DNaseI), RNA-seq, chromatin segmentation, and conservation at the locus of POU5F/OCT4 (a) and NANOG (b) genes.

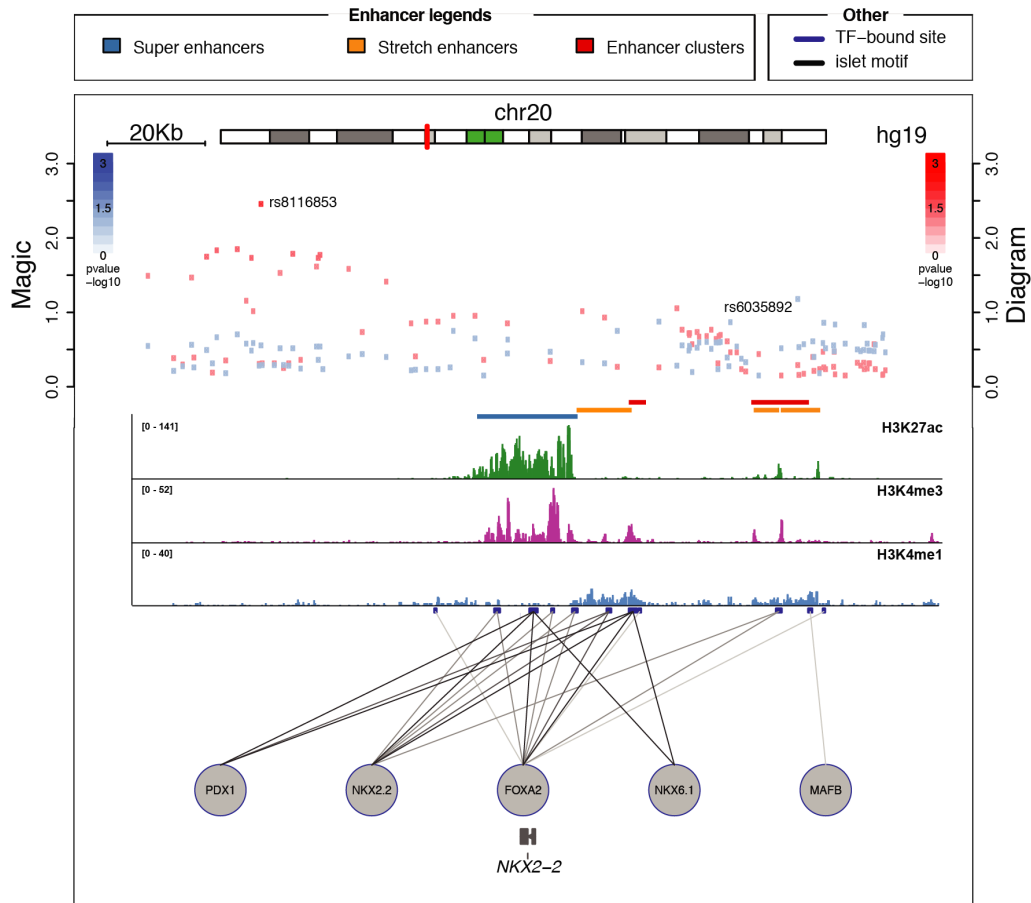

**Figure S7:** Islet Browser (<http://gattaca.imppc.org/isletregulome/>) screenshot shows super-enhancers, stretch enhancers and enhancer clusters and binding of Islets specific TFs with ChIP-seq binding for histone modifications H3K27ac, H3K4me3 and H3K4me1.

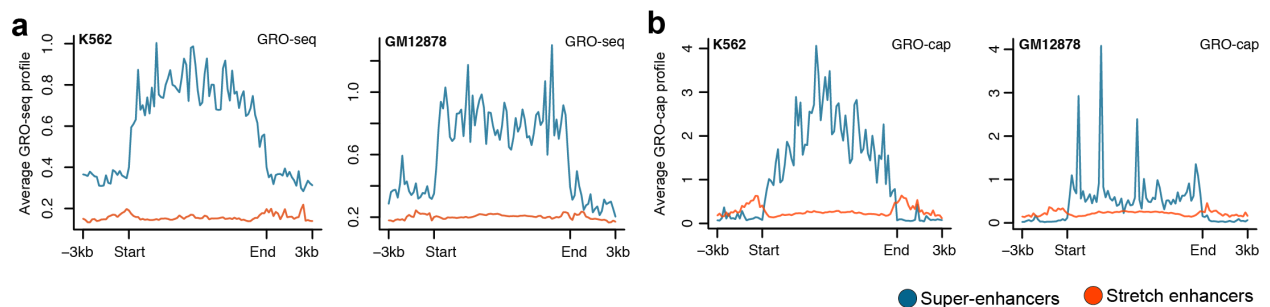

**Figure S8:** (a) GRO-seq profile at super-enhancers and stretch enhancers in K562 and GM12878 cell-lines. (b) GRO-cap profile at super-enhancers and stretch enhancers in K562 and GM12878 cell-lines.

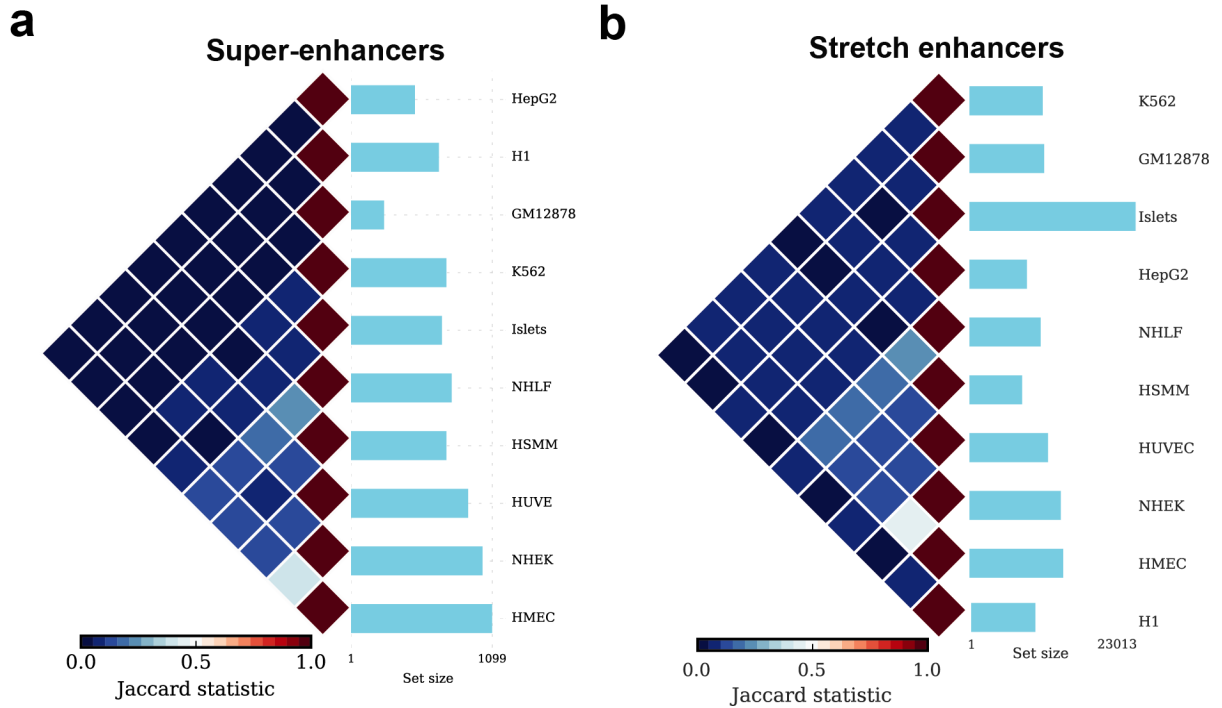

**Figure S9:** Jaccard's statistics for pairwise overlap of super-enhancers (**a**) and stretch enhancers (**b**) in 10 human cell types. We used pairwise Jaccard score and computed the p-value for pairwise combinations between super and stretch enhancers by using Wilcoxon signed rank test with continuity correction, which shows the difference is statistically significant (p-value =  $4.311005e-10$ ).

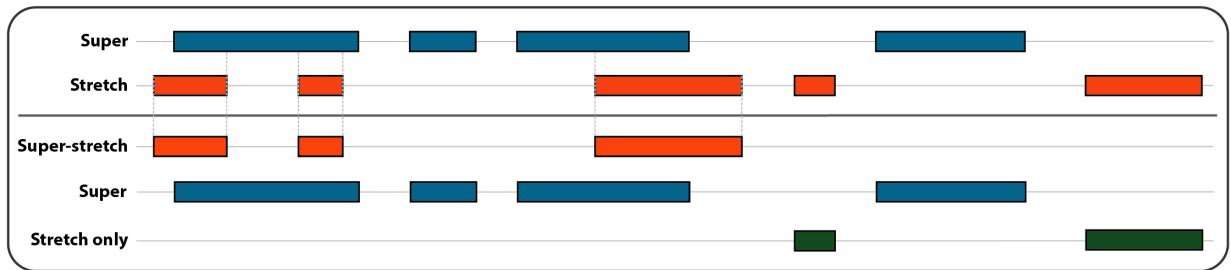

**Figure S10: Three categories of enhancers based on the overlap analysis.** Based on the overlap analysis of super and stretch enhancers, regions are divided in to three categories: (i) super-stretch – all the stretch enhancers which overlap with super-enhancers at least one base pair. (ii) super – all the super-enhancers (since majority overlap with stretch) and (iii) stretch only – those stretch enhancers which does not overlap with super-enhancers (these are referred as stretch in the following text).



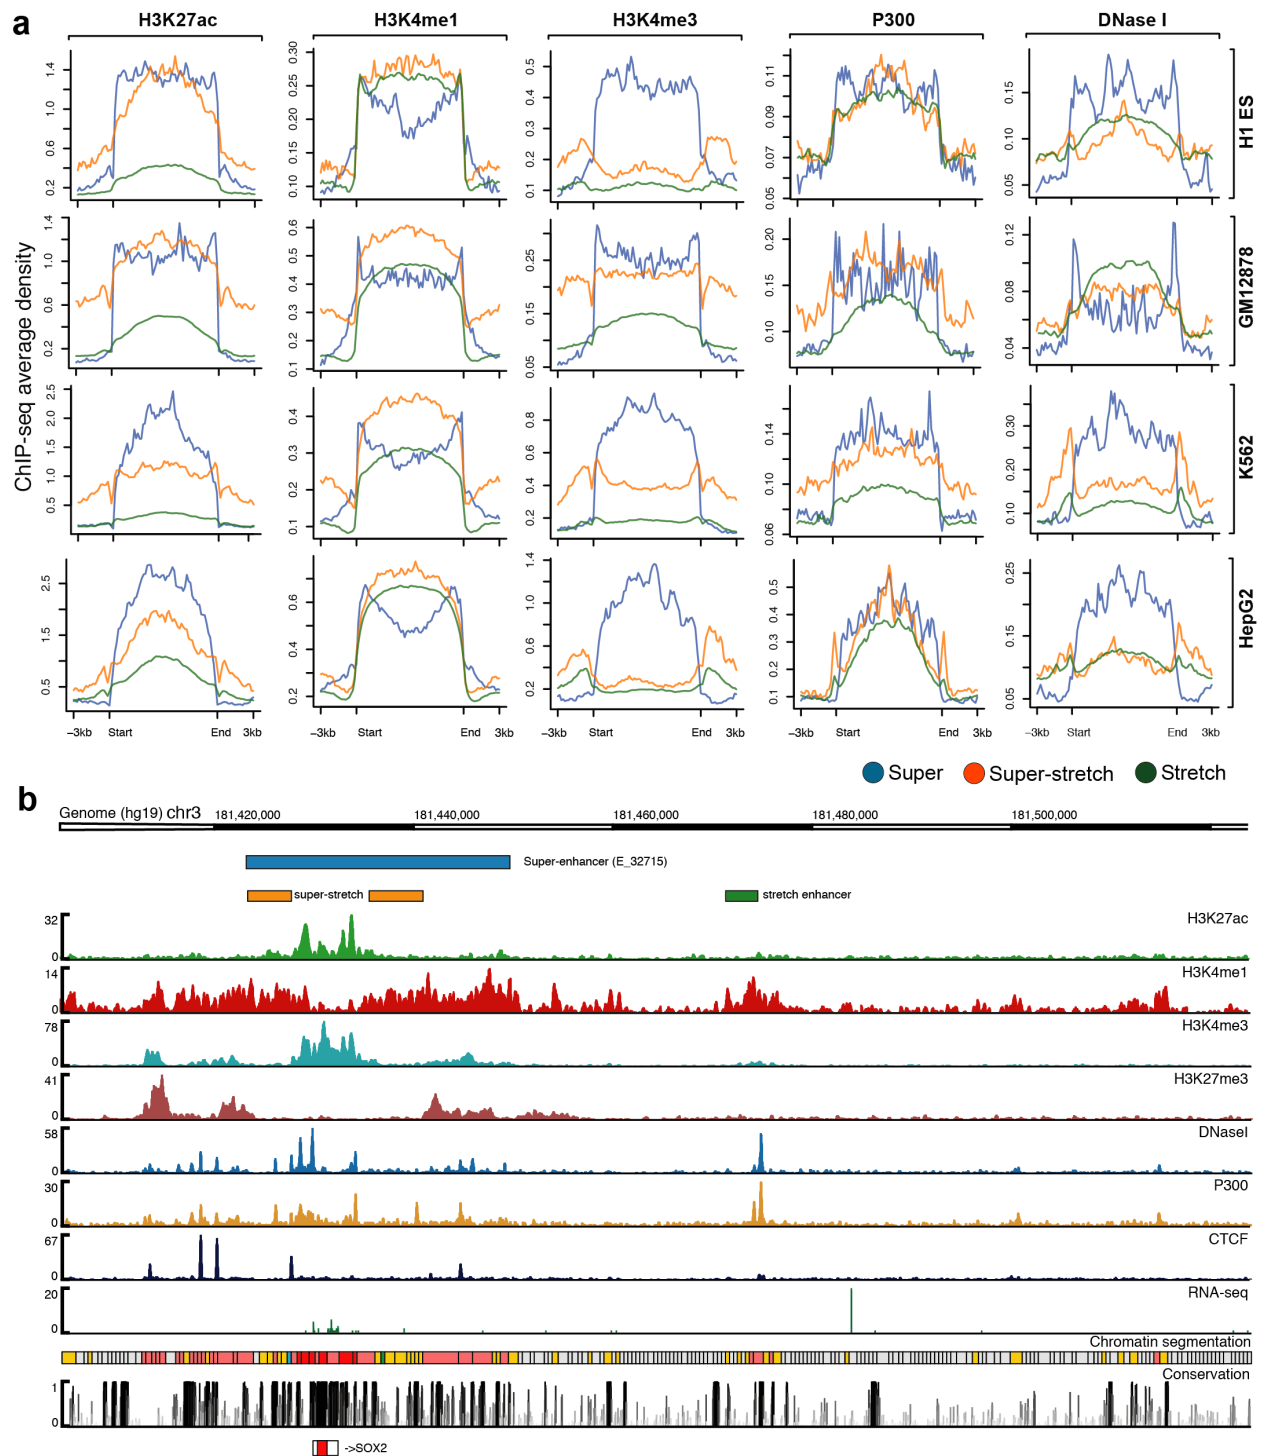

**Figure S11. Chromatin architecture at three groups of enhancers** (a) Genome-wide profile of H3K27ac, H3K4me1, H3K4me3, P300 and DNase I at super, super-stretch and stretch enhancers in H1-ES, GM12878, K562 and HepG2. (b) Genomic browser screenshot shows the overlap of super, super-stretch and stretch enhancers with ChIP-seq signal of H3K27ac, H3K4me1, H3K4me3, P300, CTCF, open chromatin (DNaseI), RNA-seq, chromatin segmentation, and conservation at the locus of Sox2 gene.

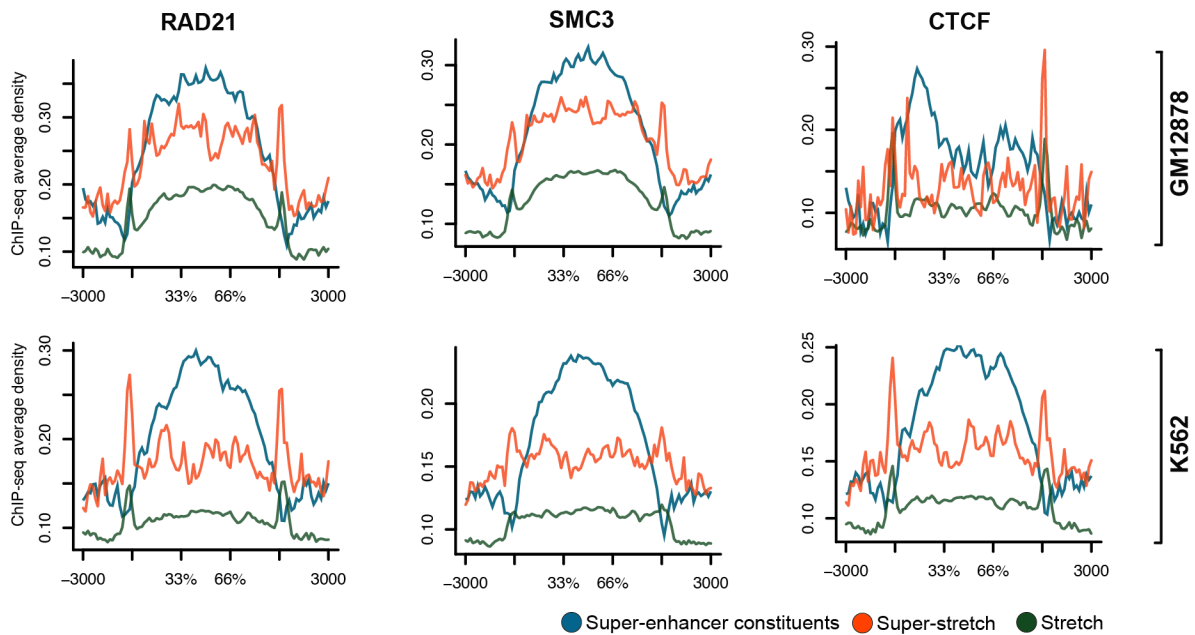

**Figure S12:** Average profile of Cohesin components (RAD21 and SMC3) and CTCF at the constituents of super-enhancers, super-stretch and stretch enhancers in K562 and GM12878 cell-lines.

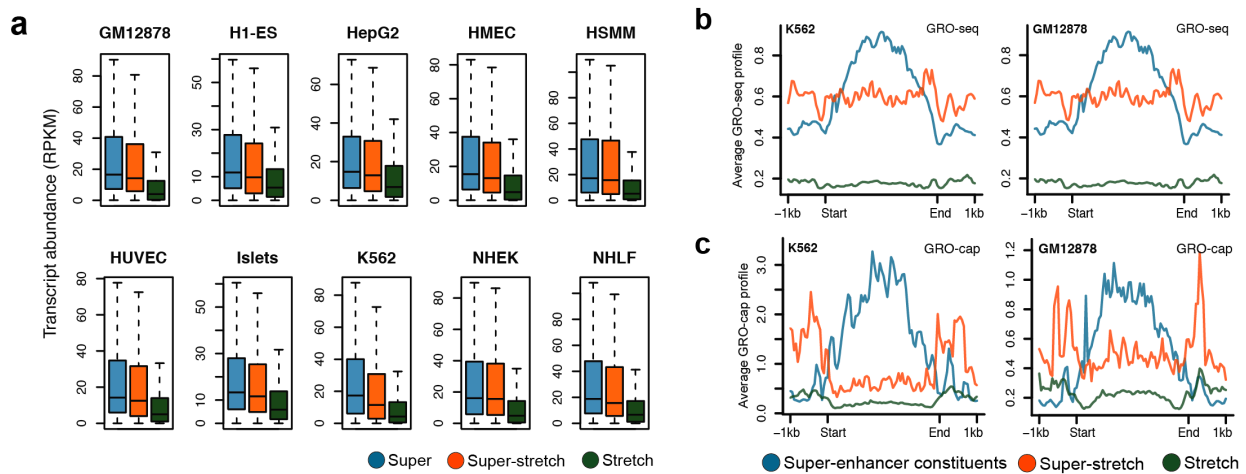

**Figure S13:** (a) Transcriptional abundance (RPKM) of genes associated with super, super-stretch and stretch enhancers across 10 cell types. (b) GRO-seq profile at the constituents of super-enhancers, super-stretch and stretch enhancers in K562 and GM12878 cell-lines. (c) GRO-cap profile at the constituents of super-enhancers, super-stretch and stretch enhancers in K562 and GM12878 cell-lines.

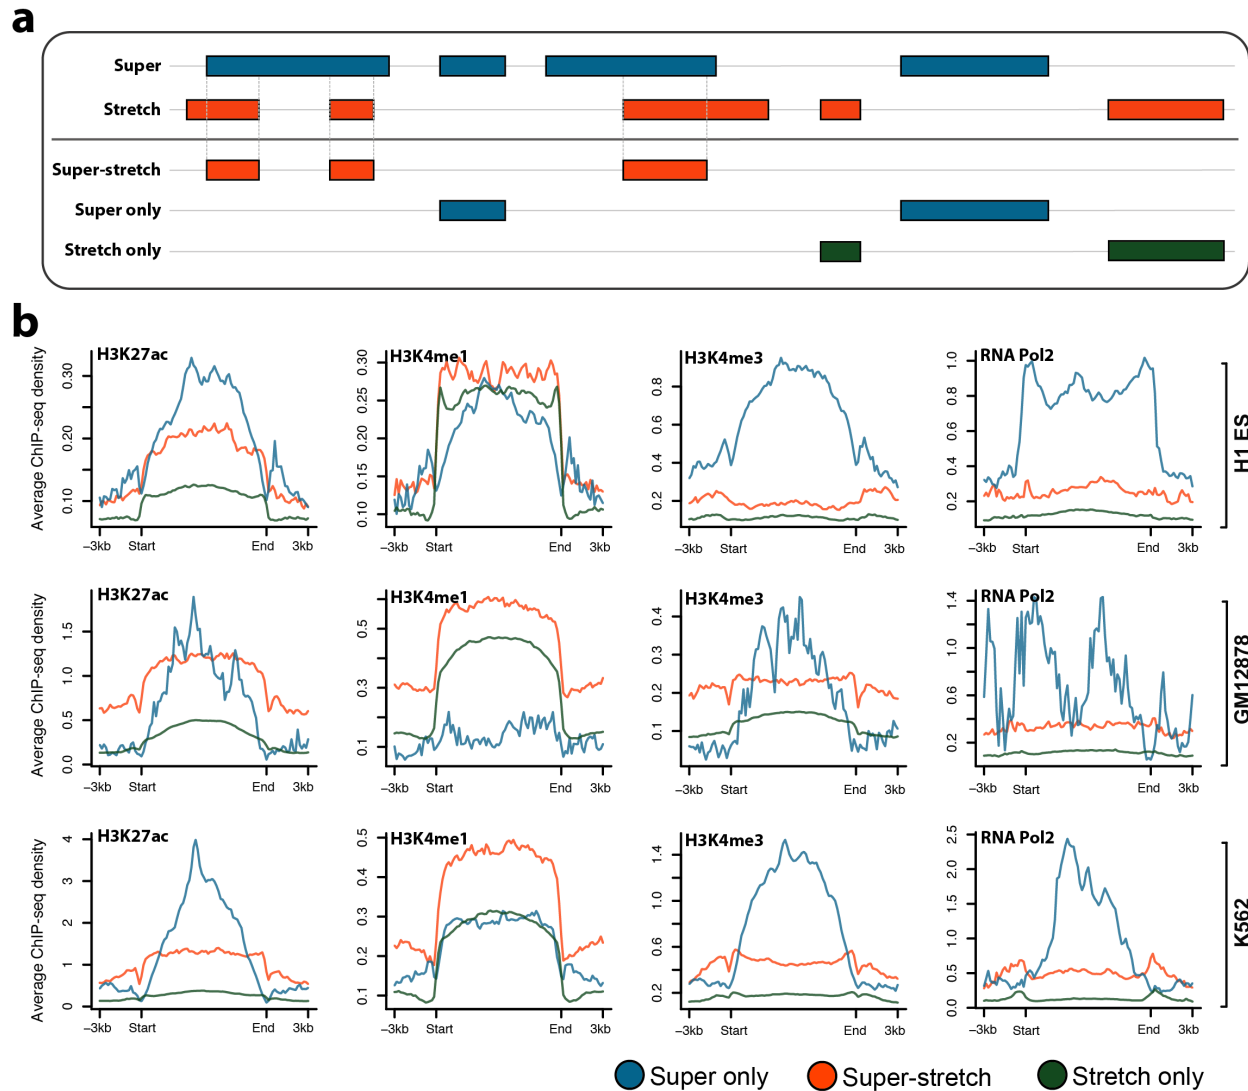

**Figure S14: Chromatin architecture at three categories of enhancers** (a) Based on the overlap analysis of super and stretch enhancer are divided into three categories: (i) super only – those super-enhancers which does not overlap with stretch enhancers (we used constituents of super-enhancers for this plot, although we get similar results with the whole super-enhancers) (ii) stretch only – those stretch enhancers which does not overlap with super-enhancers and (iii) super-stretch – there are the exact overlapping regions of super and stretch enhancers. (b) Genome-wide profile of H3K27ac, H3K4me1, H3K4me3, and RNA Pol2 at the three categories defined in (a) super only (constituents), super-stretch and stretch only enhancers in H1-ES, GM12878, and K562.

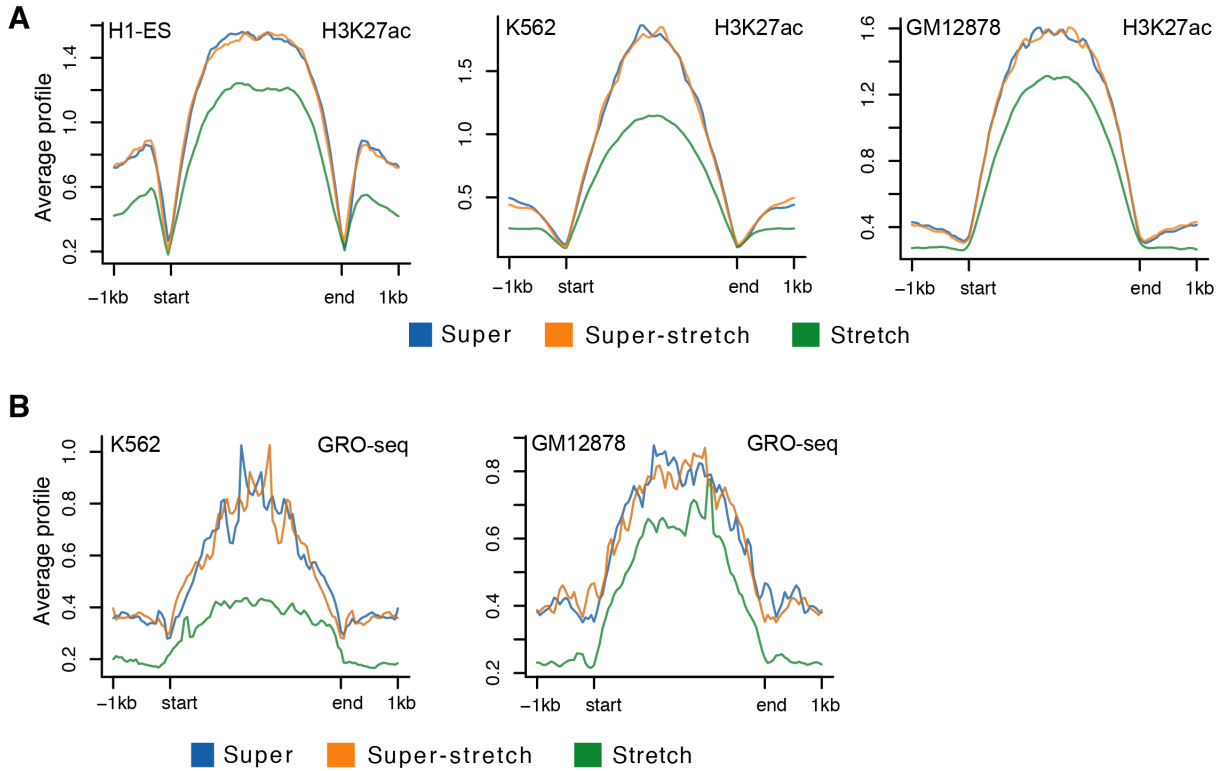

**Figure S15: Redefinition of stretch enhancers using only H3K27ac** (A) Genome-wide H3K27ac profile at the constituents of super-enhancers, super-stretch and stretch enhancers defined using only H3K27ac in H1-ES (p-value =  $1.13 \times 10^{-6}$ , Wilcoxon rank sum test), K562 (p-value = 0.00014, Wilcoxon rank sum test) and GM12878 (p-value =  $1.536 \times 10^{-5}$ , Wilcoxon rank sum test) cell-lines. (B) Average GRO-seq profile at the constituents of super-enhancers, super-stretch and stretch enhancers defined using only H3K27ac in K562 (p-value =  $1.743 \times 10^{-1}$ , Wilcoxon rank sum test) and GM12878 (p-value =  $1.009 \times 10^{-8}$ , Wilcoxon rank sum test) cell-lines.

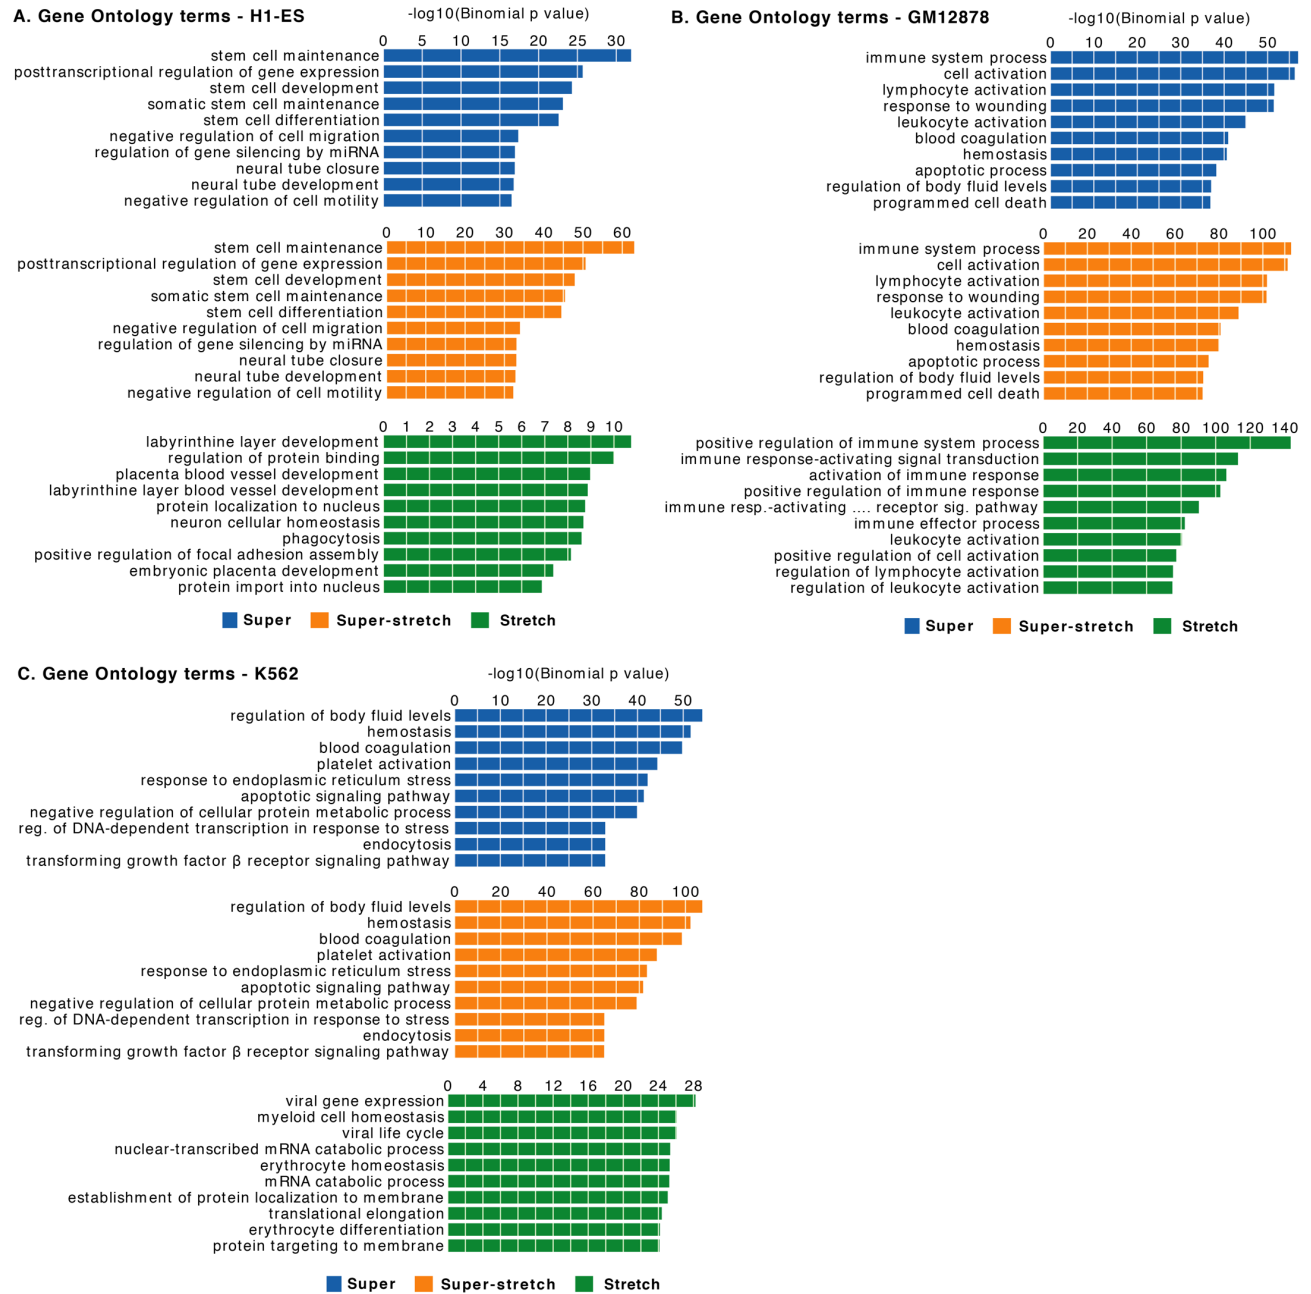

**Figure S16: GO analysis for redefined stretch enhancers using H3K27ac.** Comparison of top 10 GO terms at the constituents of super-enhancers (blue), super-stretch (orange) and stretch enhancers (green) defined using only H3K27ac in three cell types, H1-ES (A), GM12878 (B) and K562 (C).

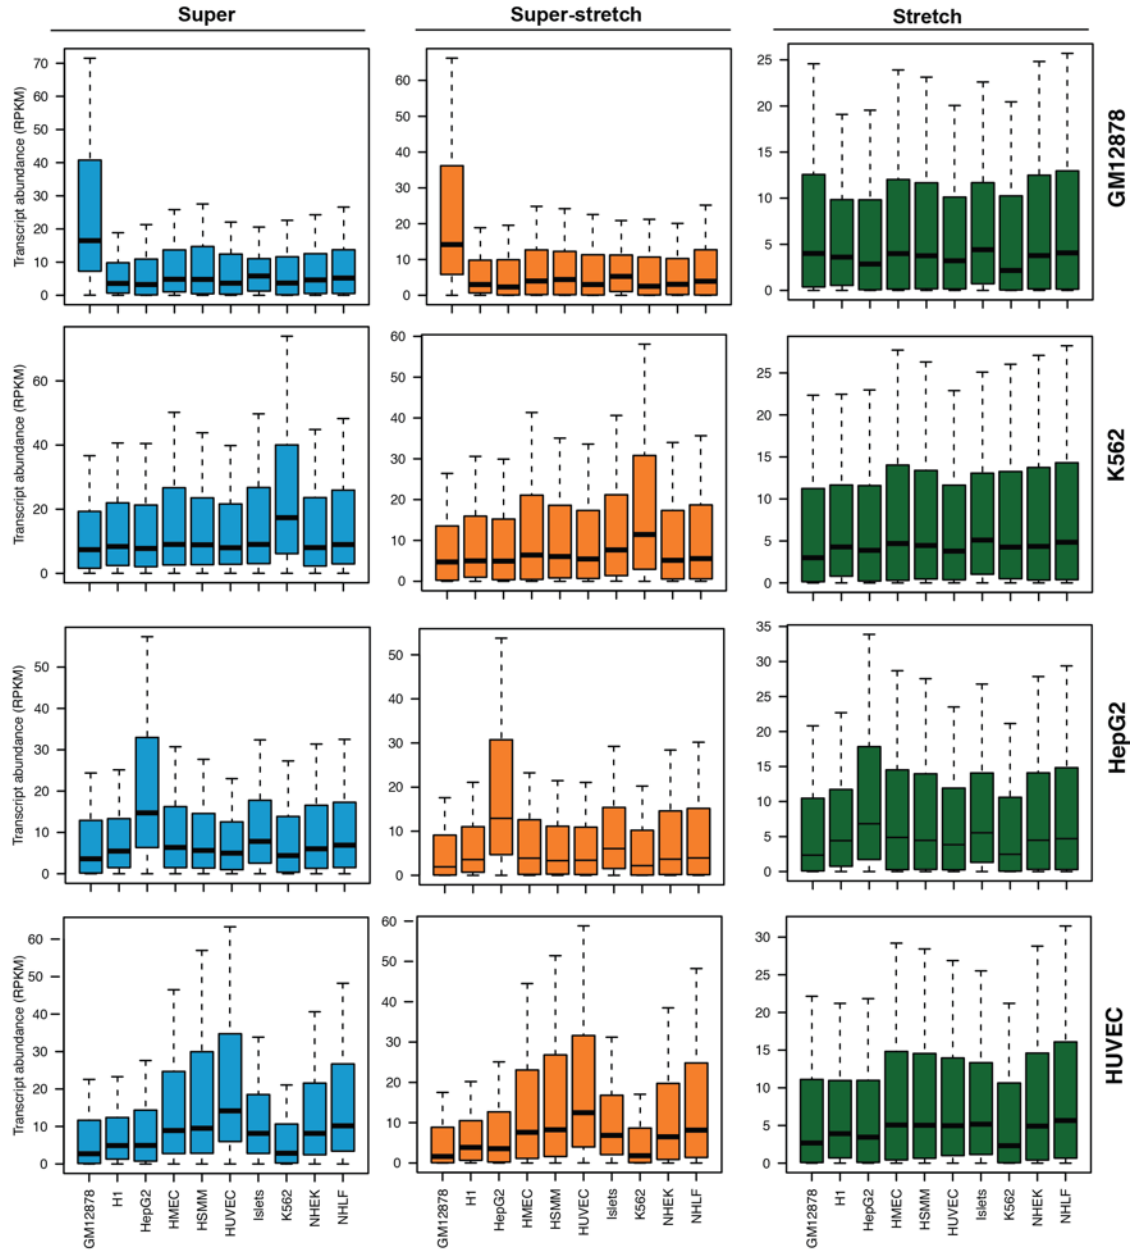

**Figure S17:** Transcriptional abundance (RPKM) of cell-type-specific genes in GM12878, K562, HepG2 and HUVEC.

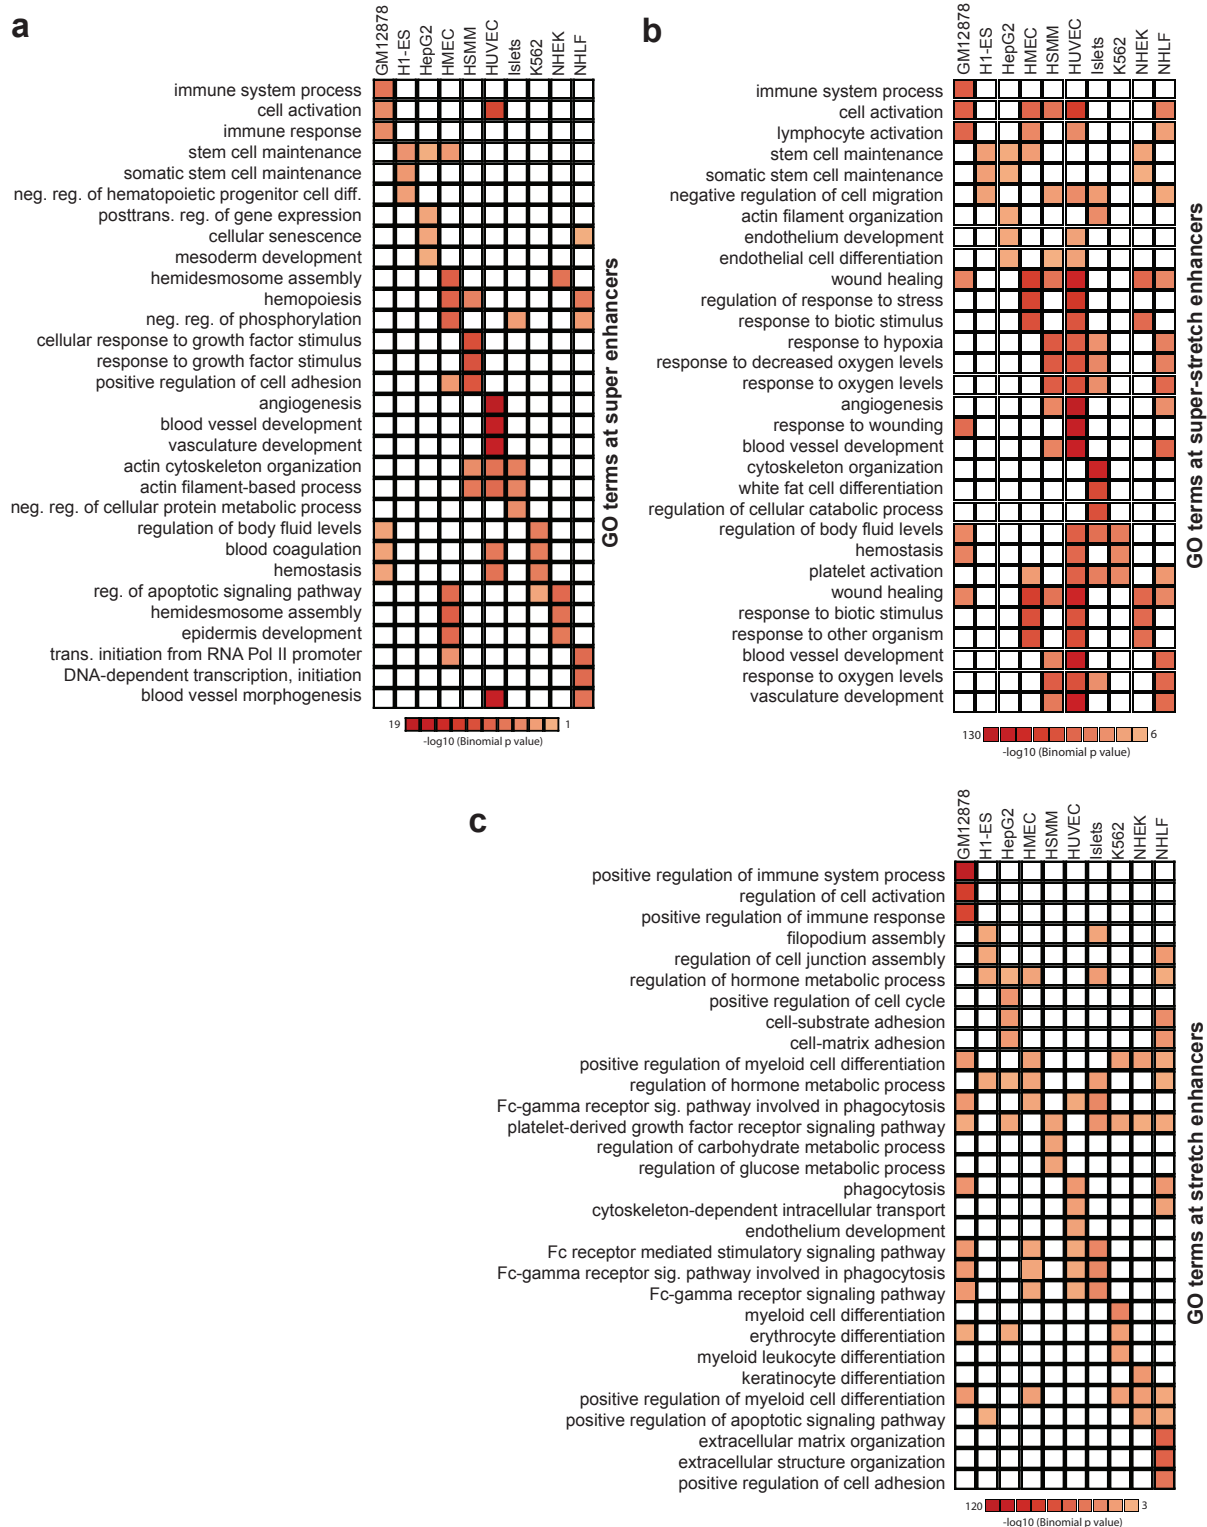

**Figure S18:** Comparison of top three GO terms from ten cell types in (a) super-enhancers, (b) super-stretch enhancers and (c) stretch enhancers.

**Table S1: ChIP-seq and DNase-seq datasets used in this study.**

| Cell type | Factor   | Data identifiers                          |
|-----------|----------|-------------------------------------------|
| GM12878   | Input    | GSM733742                                 |
| GM12878   | CTCF     | ENCF000ROM, ENCF000RON                    |
| GM12878   | H3K27ac  | GSM733771                                 |
| GM12878   | RAD21    | ENCF311CJK, ENCF800DLO                    |
| GM12878   | SMC3     | ENCF415OZI, ENCF797XWM                    |
| GM12878   | CTCF     | wgEncodeBroadHistoneGm12878CtcfStdAln     |
| GM12878   | H3K27ac  | wgEncodeBroadHistoneGm12878H3k27acStdAln  |
| GM12878   | H3K27me3 | wgEncodeBroadHistoneGm12878H3k27me3StdAln |
| GM12878   | H3K4me1  | wgEncodeBroadHistoneGm12878H3k4me1StdAln  |
| GM12878   | H3K4me3  | wgEncodeBroadHistoneGm12878H3k4me3StdAln  |
| GM12878   | P300     | wgEncodeHaibtFbsGm12878P300Pcr1xAln       |
| GM12878   | Dnase    | wgEncodeOpenChromDnaseGm12878Aln          |
| GM12878   | P300     | wgEncodeSydhTfbsGm12878P300bStdAln        |
| GM12878   | Pol2     | wgEncodeSydhTfbsGm12878Pol2StdAln         |
| H1-hESC   | H3K27me3 | wgEncodeBroadHistoneH1hescH3k27me3StdAln  |
| H1-hESC   | H3K4me1  | wgEncodeBroadHistoneH1hescH3k4me1StdAln   |
| H1-hESC   | H3K4me3  | wgEncodeBroadHistoneH1hescH3k4me3StdAln   |
| H1-hESC   | P300     | wgEncodeBroadHistoneH1hescP300kat3bAln    |
| H1-hESC   | Pol2     | wgEncodeHaibtFbsH1hescPol2V0416102Aln     |
| H1-hESC   | Dnase    | wgEncodeOpenChromDnaseH1hescAln           |
| H1-hESC   | Dnase    | wgEncodeOpenChromDnaseH1hescAln           |
| H1-hESC   | Input    | SRR067970                                 |
| HepG2     | H3K4me1  | wgEncodeBroadHistoneHepg2H3k04me1StdAln   |
| HepG2     | H3K27ac  | wgEncodeBroadHistoneHepg2H3k27acStdAln    |
| HepG2     | H3K4me3  | wgEncodeBroadHistoneHepg2H3k4me3StdAln    |
| HepG2     | P300     | wgEncodeHaibtFbsHepg2P300V0416101Aln      |
| HepG2     | Dnase    | wgEncodeOpenChromDnaseHepg2Aln            |
| HUVEC     | H3K27ac  | wgEncodeBroadHistoneHuvecH3k27acStdAln    |
| HUVEC     | H3K4me1  | wgEncodeBroadHistoneHuvecH3k4me1StdAln    |
| HUVEC     | H3K4me3  | wgEncodeBroadHistoneHuvecH3k4me3StdAln    |



|       |          |                                         |
|-------|----------|-----------------------------------------|
| HUVEC | Dnase    | wgEncodeOpenChromDnaseHuvecAln          |
| HUVEC | Pol2     | wgEncodeSydhTfbsHuvecPol2StdAln         |
| HUVEC | Pol2     | wgEncodeSydhTfbsHuvecPol2StdAln         |
| K562  | Input    | GSM733780                               |
| K562  | CTCF     | ENCF487UYG, ENCF496SZR                  |
| K562  | RAD21    | ENCF084HTD, ENCF330BAK                  |
| K562  | SMC3     | ENCF359UWD, ENCF845WVY                  |
| K562  | H3K27ac  | wgEncodeBroadHistoneK562H3k27acStdAln   |
| K562  | H3K27me3 | wgEncodeBroadHistoneK562H3k27me3StdAln  |
| K562  | H3K4me1  | wgEncodeBroadHistoneK562H3k4me1StdAln   |
| K562  | H3K4me3  | wgEncodeBroadHistoneK562H3k4me3StdAln   |
| K562  | P300     | wgEncodeBroadHistoneK562P300StdAln      |
| K562  | Dnase    | wgEncodeOpenChromDnaseK562Aln           |
| K562  | Pol2     | wgEncodeSydhTfbsK562Pol2StdAln          |
| NHEK  | Dnase    | wgEncodeOpenChromDnaseNhekAln           |
| NHLF  | Dnase    | wgEncodeUwDnaseNhlfAln                  |
| NHEK  | Dnase    | ENCF564HCA                              |
| HUVEC | Dnase    | ENCF757PTA                              |
| HSMM  | Dnase    | ENCF192DFJ                              |
| NHLF  | Dnase    | ENCF937ITN                              |
| HSMM  | Dnase    | wgEncodeOpenChromDnaseHsmmAln           |
| HepG2 | H3K27me3 | wgEncodeBroadHistoneHepg2H3k27me3StdAln |
| HepG2 | H3K27me3 | ENCF730WFM                              |
| HUVEC | H3K27me3 | wgEncodeBroadHistoneHuvecH3k27me3StdAln |
| NHEK  | H3K27me3 | wgEncodeBroadHistoneNhekH3k27me3StdAln  |
| HSMM  | H3K27me3 | wgEncodeBroadHistoneHsmmH3k27me3StdAln  |
| NHLF  | H3K27me3 | wgEncodeBroadHistoneNhlfH3k27me3StdAln  |
| NHEK  | H3K27me3 | ENCF285QUM                              |
| HMEC  | H3K27me3 | wgEncodeBroadHistoneHmecH3k27me3StdAln  |

**Table S2: GRO-seq and GRO-cap datasets used in this study.**

| <i>Cell type</i> | <i>Data type</i> | <b>GEO ID</b> |
|------------------|------------------|---------------|
| <i>K562</i>      | GRO-seq          | GSM1480325    |
|                  | GRO-cap          | GSM1480321    |
| <i>GM12878</i>   | GRO-seq          | GSM1480326    |
|                  | GRO-cap          | GSM1480323    |
